# Supplementary material
Source: publisher site journal article supplement (https://www.spandidos-publications.com/6322/downloadSupplementary)
Supplement: Supplementary file 1 [file downloadSupplementary]

## Sheet: Sheet1
Table SI. Primer sequences.
	Primer	Accession numbers	Forward (5′ → 3′)	Reverse (5′ → 3′)	PMID:
Human	IL-1β	NM_000576	CTCTCTCCTTTCAGGGCCAA	GAGAGGCCTGGCTCAACAAA	28976970
	IL-6	NM_000600	ACTCACCTCTTCAGAACGAATTC	CCATCTTTGGAAGGTTCAGGTTG	34785637
	TNF-α	NM_000594	CCTCTCTCTAATCAGCCCTCTG	GAGGACCTGGGAGTAGATGAG	36684656
	NLRP3	NM_001079821	CCATCGGCAAGACCAAGA	ACAGGCTCAGAATGCTCATC	34119876
	TXNIP	NM_006472	TGTGTGAAGTTACTCGTGTCAAA	GCAGGTACT CCGAAGTCTGT	38411328
	E-cadherin	NM_004360	CCCACCACGTACAAGGGTC	CTGGGGTATTGGGGGCATC	33729484
	α-SMA	NM_001613	GTGACTACTGCCGAGCGTG	ATAGGTGGTTTCGTGGATGC	33663392
	Bax	NM_138763	CCAAGAAGCTGAGCGAGTGT	CCGGAGGAAGTCCAATGTC	30876462
	Bcl2	NM_000657	ACTGGCTCTGTCTGAGTAAG	CCTGATGCTCTGGGTAAC	31364281
Mouse	IL-1β	NM_008361	CCAAAAGATGAAGGGCTGCT	TCATCAGGACAGCCCAGGTC	28976970
	IL-6	NM_031168	CCAGAAACCGCTATGAAGTTCC	TTGTCACCAGCATCAGTCCC	22473004
	TNF-α	NM_013693	ACAGAAAGCATGATCCGCG	GCCCCCCATCTTTTGGG	22473004
	NLRP3	NM_145827	CGCGTAGCACCATCTGAAAT	AGTGCAGGGTCCGAGGTATT	38291200
	TXNIP	NM_001009935	ATATCGGGTGGGCTCTTTCT	ATTTCATGACTCGCCTGAGC	34119876
	E-cadherin	NM_009864	TGGGTGAATTCGGGCTTGTT	TGAAGGTGACAGAGCCTCTGGA	37884902
	α-SMA	NM_007392	GGATCAGCGCCTTCAGTTCT	AGGGCTAGAAGGGTAGCACA	35800011
	Bax	NM_007527	CCCGAGAGGTCTTCTTCC	GCCTTGAGCACCAGTTTG	33467546
	Bcl2	NM_177410	TTCAGGGATGGGGTGAACTG	CACAGGGCGATGTTGT	33467546
